# Supplementary material
Source: PubMed Central journal article supplement (PMC6090370)
Supplement: tpmd180081.SD1.pdf [file tpmd180081.SD1.pdf]

## SUPPLEMENTARY TEXT 1

**Operating procedures for ELISA.** The standardized dried blood spots (1 cm diameter containing  $\approx 40$   $\mu\text{L}$  of blood) were eluted by incubation in 400 mL of phosphate-buffered saline (PBS-Tween 0.1%) at 4°C for 24 hours. Maxisorp plates (Nunc, Roskilde, Denmark) were coated with the Pf merozoite surface protein 119 (MSP1-19)/Pf CSP peptide (Vaximax, France) at a concentration of 1  $\mu\text{g}/\text{mL}$  in coating buffer (PBS + Phenol Red 1%) at 4°C overnight. After washing (with a solution of PBS-Tween 0.1% + NaCl), the plates were blocked for 1 hour under stirring at room temperature with 150 mL of saturation buffer (PBS-Tween 0.1% + milk powder 3%). Thereafter, each eluted sample was incubated in duplicate for 2 hours under stirring at room temperature at 1/20 dilution in sample dilution buffer (PBS-Tween 0.1% + milk powder 1% + sodium azide 0.02%). Antihuman IgG coupled to the peroxidase (Invitrogen) was incubated at a 1/3,000 dilution for 1 hour under stirring at room temperature. Substrate TMB one (3,3',5,5'-tetramethylbenzidine) (Promega) was added for 30 minutes at room temperature protected from light then stopping the reaction with 0.2 M  $\text{H}_2\text{SO}_4$ , and absorbance was measured at 450 nm. In parallel, each test sample was assessed in a blank well containing no Pf MSP1-19/Pf CSP peptide (ODn) to measure nonspecific reactions. Individual results were expressed as the  $\Delta\text{OD}$  value:  $\Delta\text{OD} = \text{OD}_x - \text{OD}_n$ .  $\text{OD}_x$  and  $\text{OD}_n$  represent the mean of individual optical density (OD) in two antigen wells and one blank well containing no Pf MSP1-19/Pf CSP peptide, respectively. Specific anti-Pf MSP1-19/Pf CSP IgG responses were also assayed in nonmalaria-exposed individuals (negative samples from France:  $n = 18$ ) to quantify the nonspecific background Ab level and to calculate the cut-off value (mean [ $\Delta\text{OD}_{\text{neg}}$ ] + 3SD). Based on our findings, a participant was classified as an immune responder to Pf MSP1-19 and Pf CSP if  $\Delta\text{OD}$  was  $> 0.162$  and  $> 0.115$ , respectively.

All peptide batches were shipped in lyophilized form and then suspended in ultrafiltered water and frozen in aliquots at  $-20^\circ\text{C}$  until use.

SUPPLEMENTAL TABLE 1  
Seroprevalence in antibody response to CSP per age group and surveys

| Village           | Survey of blood collection | Total population | Blood collection date | Characteristic of blood spot |      | Median age (range) (years) | Pf CSP antibody prevalence % |                                 |                                 |                                 |                             |                                 |                                 |                               |
|-------------------|----------------------------|------------------|-----------------------|------------------------------|------|----------------------------|------------------------------|---------------------------------|---------------------------------|---------------------------------|-----------------------------|---------------------------------|---------------------------------|-------------------------------|
|                   |                            |                  |                       | Number of dry blood spot     | Male |                            | Female                       | Age (years)                     |                                 |                                 |                             |                                 |                                 |                               |
|                   |                            |                  |                       |                              |      |                            |                              | Male                            | Female                          | Total                           | 0-4                         | 5-15                            | 16-59                           | 60 up                         |
| Htoo Pyin NyarTPN |                            |                  |                       |                              |      |                            |                              |                                 |                                 |                                 |                             |                                 |                                 |                               |
| M0                | May 20, 2013               | 373              | 257                   | 145                          | 112  | 27.4 (1-66)                | %<br>(95% CI)<br>(n/N)       | 5.5<br>(2.6-11.0)<br>(8/145)    | 3.6<br>(1.2-9.4)<br>(4/112)     | 4.7<br>(2.6-8.2)<br>(12/257)    | 16.7<br>(0.9-63.5)<br>(1/6) | 3.9<br>(1.0-11.7)<br>(3/77)     | 4.8<br>(2.2-9.6)<br>(8/167)     | 0.0<br>(0.0-43.9)<br>(0/7)    |
| M3                | August 23, 2013            | 406              | 267                   | 143                          | 124  | 25.1 (1-66)                | %<br>(95% CI)<br>(n/N)       | 21.7<br>(15.4-29.5)<br>(31/143) | 21.0<br>(14.4-29.4)<br>(26/124) | 21.4<br>(16.7-26.9)<br>(57/267) | 0.0<br>(0.0-15.5)<br>(0/27) | 16.0<br>(8.9-26.7)<br>(12/75)   | 28.7<br>(21.9-36.5)<br>(45/157) | 0.0<br>(0.0-40.2)<br>(0-8)    |
| M6                | November 7, 2013           | 434              | 300                   | 159                          | 141  | 24.6 (0-66)                | %<br>(95% CI)<br>(n/N)       | 3.1<br>(1.2-7.6)<br>(5/159)     | 5.0<br>(2.2-10.3)<br>(7/141)    | 4.0<br>(2.2-7.1)<br>(12/300)    | 0.0<br>(0.0-11.2)<br>(0/39) | 0.0<br>(0.0-5.4)<br>(0/85)      | 7.1<br>(3.9-12.4)<br>(12/169)   | 0.0<br>(0.0-43.9)<br>(0/7)    |
| M9                | January 28, 2014           | 464              | 307                   | 160                          | 147  | 24.0 (0-66)                | %<br>(95% CI)<br>(n/N)       | 3.1<br>(1.2-7.5)<br>(5/160)     | 3.4<br>(1.3-8.2)<br>(5/147)     | 3.3<br>(1.7-6.1)<br>(10/307)    | 0.0<br>(0.0-10.0)<br>(0/46) | 1.2<br>(0.1-7.2)<br>(1/86)      | 5.4<br>(2.7-10.4)<br>(9/166)    | 0.0<br>(0.0-37.1)<br>(0/9)    |
| M12               | April 23, 2014             | 473              | 264                   | 138                          | 126  | 22.2 (0-66)                | %<br>(95% CI)<br>(n/N)       | 3.6<br>(1.3-8.7)<br>(5/138)     | 2.4<br>(0.6-7.3)<br>(3/126)     | 3.0<br>(1.4-6.1)<br>(8/264)     | 0.0<br>(0.0-9.8)<br>(0/45)  | 1.2<br>(0.1-7.3)<br>(1/85)      | 5.4<br>(2.4-11.2)<br>(7/130)    | 0.0<br>(0.0-43.9)<br>(0/7)    |
| M15               | July 14, 2014              | 492              | 234                   | 127                          | 107  | 24.4 (0-66)                | %<br>(95% CI)<br>(n/N)       | 2.4<br>(0.6-7.3)<br>(3/127)     | 0.9<br>(0.1-5.8)<br>(1/107)     | 1.7<br>(0.6-4.6)<br>(4/234)     | 0.0<br>(0.0-13.0)<br>(0/33) | 1.5<br>(0.1-9.3)<br>(1/66)      | 2.4<br>(0.6-7.3)<br>(3/127)     | 57.1<br>(20.2-88.2)<br>(4/7)  |
| M18               | October 8, 2014            | 501              | 266                   | 139                          | 127  | 22.8 (0-66)                | %<br>(95% CI)<br>(n/N)       | 5.0<br>(2.2-10.5)<br>(7/139)    | 2.4<br>(0.6-7.3)<br>(3/127)     | 3.8<br>(1.9-7.0)<br>(10/266)    | 0.0<br>(0.0-9.8)<br>(0/45)  | 2.5<br>(0.4-9.7)<br>(2/79)      | 5.2<br>(2.3-10.7)<br>(7/136)    | 16.7<br>(0.9-63.5)<br>(1/6)   |
| Tar Au Ta         |                            |                  |                       |                              |      |                            |                              |                                 |                                 |                                 |                             |                                 |                                 |                               |
| M0                | June 14, 2013              | 740              | 402                   | 192                          | 210  | 26.7 (0-80)                | %<br>(95% CI)<br>(n/N)       | 17.7<br>(2.7-24.0)<br>(34/192)  | 9.1<br>(5.7-14.0)<br>(19/210)   | 13.2<br>(10.1-17.0)<br>(53/402) | 7.1<br>(3.7-35.8)<br>(1/14) | 0.7<br>(0.0-4.7)<br>(1/135)     | 18.5<br>(13.8-24.2)<br>(43/233) | 40.0<br>(20.0-63.6)<br>(8/20) |
| M3                | September 12, 2013         | 785              | 308                   | 145                          | 163  | 22.5 (0-70)                | %<br>(95% CI)<br>(n/N)       | 26.9<br>(20.0-35.0)<br>(39/145) | 23.9<br>(17.8-31.4)<br>(39/163) | 25.3<br>(20.6-30.6)<br>(78/308) | 4.7<br>(0.8-17.1)<br>(2/43) | 17.3<br>(11.0-25.9)<br>(19/110) | 35.5<br>(27.7-44.0)<br>(50/141) | 50.0<br>(24.0-76.0)<br>(7/14) |
| M6                | November 26, 2013          | 789              | 205                   | 102                          | 103  | 23.7 (1-70)                | %<br>(95% CI)<br>(n/N)       | 16.7<br>(10.3-25.6)<br>(17/102) | 9.7<br>(5.0-17.5)<br>(10/103)   | 13.2<br>(9.0-18.8)<br>(27/205)  | 3.6<br>(0.2-20.2)<br>(1/28) | 7.1<br>(2.7-16.6)<br>(5/70)     | 16.0<br>(9.5-25.3)<br>(15/94)   | 46.2<br>(20.4-73.9)<br>(6/13) |
| M9                | February 18, 2014          | 814              | 292                   | 143                          | 149  | 21.5 (0-80)                | %<br>(95% CI)<br>(n/N)       | 18.9<br>(13.0-26.5)<br>(27/143) | 14.8<br>(9.7-21.7)<br>(22/149)  | 16.8<br>(12.8-21.7)<br>(49/292) | 5.4<br>(1.4-15.8)<br>(3/56) | 6.8<br>(2.8-14.8)<br>(6/88)     | 24.8<br>(18.0-33.1)<br>(34/137) | 54.6<br>(24.6-81.9)<br>(6/11) |
| M12               | May 15, 2014               | 833              | 250                   | 114                          | 136  | 19.2 (0-70)                | %<br>(95% CI)<br>(n/N)       | 12.3<br>(7.1-20.1)<br>(14/114)  | 5.2<br>(2.3-10.7)<br>(7/136)    | 8.4<br>(5.4-12.7)<br>(21/250)   | 1.6<br>(0.1-9.7)<br>(1/63)  | 0.0<br>(0.0-6.6)<br>(0/69)      | 16.5<br>(10.3-25.1)<br>(18/109) | 22.2<br>(4.0-59.8)<br>(2/9)   |
| M15               | August 6, 2014             | 861              | 305                   | 150                          | 155  | 21.5 (0-80)                | %<br>(95% CI)<br>(n/N)       | 14.7<br>(9.6-21.6)<br>(22/150)  | 10.3<br>(6.2-16.5)<br>(16/155)  | 12.5<br>(9.1-16.8)<br>(38/305)  | 1.8<br>(0.1-10.8)<br>(1/56) | 2.0<br>(0.4-7.9)<br>(2/98)      | 20.7<br>(14.4-28.7)<br>(28/135) | 43.8<br>(20.8-69.5)<br>(7/16) |
| M18               | October 30, 2014           | 879              | 196                   | 94                           | 102  | 18.9 (0-70)                | %<br>(95% CI)<br>(n/N)       | 11.7<br>(6.3-20.4)<br>(11/94)   | 6.9<br>(3.0-14.1)<br>(7/102)    | 9.2<br>(5.7-14.3)<br>(18/196)   | 2.0<br>(0.1-12.2)<br>(1/49) | 1.8<br>(0.1-10.6)<br>(1/57)     | 16.9<br>(9.9-27.0)<br>(14/83)   | 28.6<br>(5.1-69.7)<br>(2/7)   |

(continued)

SUPPLEMENTAL TABLE 1  
Continued

| Village      | Survey of blood collection | Total population | Blood collection date | Characteristic of blood spot |                            | Pf CSP antibody prevalence % |                           |                                 |                                  |                              |                                |                                 |                               |
|--------------|----------------------------|------------------|-----------------------|------------------------------|----------------------------|------------------------------|---------------------------|---------------------------------|----------------------------------|------------------------------|--------------------------------|---------------------------------|-------------------------------|
|              |                            |                  |                       | Number of dry blood spot     | Median age (range) (years) | Gender                       |                           | Age (years)                     |                                  |                              |                                |                                 |                               |
|              |                            |                  |                       |                              |                            | Male                         | Female                    | Total                           | 0-4                              | 5-15                         | 16-59                          | 60 up                           |                               |
| Ka Nu Hta    |                            |                  |                       |                              |                            |                              |                           |                                 |                                  |                              |                                |                                 |                               |
| M0           | June 14, 2013              | 348              | 323                   | 178                          | 145                        | 29.0 (1-73)                  | 7.9<br>(95% CI)<br>(n/N)  | 4.1<br>(1.7-9.2)<br>(6/145)     | 6.2<br>(3.9-9.6)<br>(20/323)     | 0.0<br>(0.0-34.5)<br>(0/10)  | 1.2<br>(0.1-7.1)<br>(1/87)     | 8.0<br>(4.9-12.7)<br>(17/213)   | 15.4<br>(2.7-46.3)<br>(2/13)  |
| M3           | September 12, 2013         | 417              | 275                   | 148                          | 127                        | 27.9 (1-73)                  | 26.4<br>(95% CI)<br>(n/N) | 26.8<br>(19.5-35.5)<br>(34/127) | 26.5<br>(21.5-32.3)<br>(73/275)  | 13.0<br>(3.4-34.7)<br>(3/23) | 17.6<br>(10.1-28.5)<br>(13/74) | 32.7<br>(25.8-40.5)<br>(55/168) | 20.0<br>(3.5-55.8)<br>(2/10)  |
| M6           | December 11, 2013          | 435              | 261                   | 140                          | 121                        | 28.0 (0-73)                  | 12.9<br>(95% CI)<br>(n/N) | 4.1<br>(1.5-9.9)<br>(5/121)     | 8.8<br>(5.8-13.1)<br>(23/261)    | 0.0<br>(0-19.2)<br>(0/21)    | 2.8<br>(0.5-10.7)<br>(2/71)    | 12.0<br>(7.5-18.3)<br>(19/159)  | 2.0<br>(3.5-55.8)<br>(2/10)   |
| M9           | March 5, 2014              | 449              | 303                   | 155                          | 148                        | 25.9 (0-73)                  | 2.6<br>(95% CI)<br>(n/N)  | 4.1<br>(1.7-9.0)<br>(6/148)     | 6.6<br>(4.2-10.2)<br>(20/303)    | 0.0<br>(0.0-11.4)<br>(0/38)  | 2.4<br>(0.4-9.0)<br>(2/85)     | 9.5<br>(5.7-15.2)<br>(16/169)   | 18.2<br>(3.2-52.2)<br>(2/11)  |
| M12          | May 26, 2014               | 469              | 301                   | 160                          | 141                        | 24.9 (0-73)                  | 7.5<br>(95% CI)<br>(n/N)  | 2.1<br>(0.6-6.6)<br>(3/141)     | 5.0<br>(2.9-8.3)<br>(15/301)     | 0.0<br>(0.0-10.7)<br>(0/41)  | 1.2<br>(0.1-7.3)<br>(1/85)     | 8.3<br>(4.8-13.8)<br>(14/169)   | 0.0<br>(0.0-43.9)<br>(0/7)    |
| M15          | August 21, 2014            | 485              | 303                   | 164                          | 139                        | 25.8 (0-70)                  | 8.5<br>(95% CI)<br>(n/N)  | 2.9<br>(0.9-7.7)<br>(4/139)     | 5.9<br>(3.7-9.4)<br>(18/303)     | 0.0<br>(0.0-10.2)<br>(0/43)  | 4.2<br>(1.1-12.5)<br>(3/72)    | 7.9<br>(4.5-13.1)<br>(14/178)   | 10.0<br>(0.5-45.9)<br>(1/10)  |
| M18          | November 13, 2014          | 495              | 285                   | 155                          | 130                        | 24.6 (0.70)                  | 5.2<br>(95% CI)<br>(n/N)  | 1.5<br>(0.3-6.0)<br>(2/130)     | 3.5<br>(1.8-6.6)<br>(10/285)     | 0.0<br>(0.0-9.1)<br>(0/49)   | 0.0<br>(0.0-6.9)<br>(0/66)     | 6.3<br>(3.2-11.5)<br>(10/160)   | 0.0<br>(0-34.5)<br>(0/10)     |
| Htee Kaw Taw |                            |                  |                       |                              |                            |                              |                           |                                 |                                  |                              |                                |                                 |                               |
| M0           | July 4, 2013               | 899              | 487                   | 238                          | 249                        | 26.2 (0-94)                  | 8.8<br>(95% CI)<br>(n/N)  | 6.4<br>(3.8-10.4)<br>(16/249)   | 7.6<br>(5.5-10.4)<br>(37/487)    | 0.0<br>(0.0-16.7)<br>(0/25)  | 3.0<br>(1.1-7.2)<br>(5/167)    | 10.1<br>(6.9-14.4)<br>(28/277)  | 22.2<br>(7.4-48.1)<br>(4/18)  |
| M3           | October 7, 2013            | 979              | 524                   | 263                          | 261                        | 24.1 (0-89)                  | 19.0<br>(95% CI)<br>(n/N) | 23.4<br>(18.5-29.1)<br>(61/261) | 21.2<br>(17.8-25.0)<br>(111/524) | 10.2<br>(3.8-23.0)<br>(5/49) | 12.0<br>(7.9-17.8)<br>(22/183) | 28.6<br>(23.4-34.4)<br>(79/276) | 55.6<br>(12.1-58.5)<br>(5/16) |
| M6           | January 8, 2014            | 1,029            | 493                   | 241                          | 252                        | 21.9 (0-78)                  | 5.0<br>(95% CI)<br>(n/N)  | 4.4<br>(2.3-7.9)<br>(11/252)    | 4.7<br>(3.1-7.0)<br>(23/493)     | 0.0<br>(0.0-7.1)<br>(0/64)   | 2.1<br>(0.1-5.5)<br>(4/195)    | 7.2<br>(4.3-11.6)<br>(16/223)   | 27.3<br>(7.3-60.7)<br>(3/11)  |
| M9           | May 1, 2014                | 1,070            | 478                   | 241                          | 237                        | 22.6 (0-78)                  | 4.2<br>(95% CI)<br>(n/N)  | 3.4<br>(1.6-6.8)<br>(8/237)     | 3.8<br>(2.3-6.0)<br>(18/478)     | 0.0<br>(0.0-6.8)<br>(0/67)   | 4.3<br>(0.2-4.7)<br>(2/166)    | 5.9<br>(3.4-10.0)<br>(14/236)   | 22.2<br>(4.0-59.8)<br>(2/9)   |
| M12          | June 24, 2014              | 1,192            | 512                   | 257                          | 255                        | 21.8 (0-89)                  | 3.9<br>(95% CI)<br>(n/N)  | 1.6<br>(0.5-4.2)<br>(4/255)     | 2.7<br>(1.6-4.7)<br>(14/512)     | 0.0<br>(0.0-6.8)<br>(0/88)   | 1.1<br>(0.2-4.4)<br>(2/178)    | 4.7<br>(2.5-8.5)<br>(11/233)    | 7.7<br>(0.4-3.8)<br>(1/13)    |
| M15          | September 16, 2014         | 1,217            | 504                   | 264                          | 240                        | 21.8 (0-78)                  | 5.3<br>(95% CI)<br>(n/N)  | 1.7<br>(0.5-4.5)<br>(4/240)     | 3.6<br>(2.2-5.7)<br>(18/504)     | 1.2<br>(0.1-7.6)<br>(1/82)   | 3.4<br>(1.4-7.7)<br>(6/175)    | 4.7<br>(2.5-8.5)<br>(11/235)    | 0.0<br>(0.0-30.1)<br>(0/12)   |
| M18          | December 8, 2014           | 1,236            | 471                   | 233                          | 238                        | 19.9 (0-78)                  | 2.6<br>(95% CI)<br>(n/N)  | 1.7<br>(0.5-4.5)<br>(4/238)     | 2.2<br>(1.1-4.1)<br>(10/471)     | 1.3<br>(0.1-7.9)<br>(1/78)   | 1.0<br>(0.2-4.0)<br>(2/198)    | 3.3<br>(1.4-7.4)<br>(6/181)     | 7.1<br>(0.4-35.8)<br>(1/14)   |

CI = confidence interval.

SUPPLEMENTAL TABLE 2  
Seroprevalence in antibody response to MSP-1<sub>19</sub> per age group and surveys

| Survey of blood collection | Total population | Blood collection date | Characteristic of blood spot |        | PfMSP1-19 antibody prevalence % |        |             |             |                                              |                                  |                                  |                                |                                 |                                  |                                  |
|----------------------------|------------------|-----------------------|------------------------------|--------|---------------------------------|--------|-------------|-------------|----------------------------------------------|----------------------------------|----------------------------------|--------------------------------|---------------------------------|----------------------------------|----------------------------------|
|                            |                  |                       | Number of dry blood spot     |        | Gender                          |        | Age (years) |             |                                              |                                  |                                  |                                |                                 |                                  |                                  |
|                            |                  |                       | Male                         | Female | Male                            | Female | Total       | 0-4         | 5-15                                         | 16-59                            | 60 up                            |                                |                                 |                                  |                                  |
| Htoo Pwin Nyar             |                  |                       |                              |        |                                 |        |             |             |                                              |                                  |                                  |                                |                                 |                                  |                                  |
| M0                         | 373              | May 20, 2013          | 145                          | 111    | 256                             | 145    | 111         | 27.2 (1-66) | 49.7<br>(95% CI)<br>(41.3-58.0)<br>(72/145)  | 46.0<br>(36.5-55.6)<br>(51/111)  | 48.1<br>(41.8-54.4)<br>(123/256) | 16.7<br>(0.9-63.5)<br>(1/6)    | 30.8<br>(21.1-42.4)<br>(24/78)  | 56.6<br>(48.7-64.2)<br>(94/166)  | 66.7<br>(24.1-94.0)<br>(4/6)     |
| M3                         | 406              | August 23, 2013       | 148                          | 130    | 278                             | 148    | 130         | 25.3 (1-66) | 49.3<br>(95% CI)<br>(41.1-57.6)<br>(73/148)  | 44.6<br>(36.0-53.6)<br>(58/130)  | 47.1<br>(41.2-53.2)<br>(131/278) | 21.4<br>(9.0-41.5)<br>(6/28)   | 40.5<br>(29.8-52.2)<br>(32/79)  | 54.0<br>(46.0-61.8)<br>(88/163)  | 62.5<br>(25.9-89.8)<br>(5/8)     |
| M6                         | 434              | November 7, 2013      | 158                          | 141    | 299                             | 158    | 141         | 24.6 (0-66) | 58.2<br>(95% CI)<br>(50.1-65.9)<br>(92/158)  | 55.3<br>(46.7-63.6)<br>(78/141)  | 56.9<br>(51.0-62.5)<br>(170/299) | 33.3<br>(19.6-50.3)<br>(13/39) | 56.0<br>(44.7-66.6)<br>(47/84)  | 61.5<br>(53.7-68.8)<br>(104/169) | 85.7<br>(42.0-99.3)<br>(6/7)     |
| M9                         | 464              | January 28, 2014      | 160                          | 146    | 306                             | 160    | 146         | 23.9 (0-66) | 80.0<br>(95% CI)<br>(72.8-85.7)<br>(128/160) | 76.0<br>(68.1-82.5)<br>(111/146) | 78.1<br>(73.0-82.5)<br>(239/306) | 58.7<br>(43.3-72.7)<br>(27/46) | 82.6<br>(72.6-89.6)<br>(71/86)  | 80.0<br>(72.9-85.7)<br>(132/165) | 100.0<br>(62.9-100.0)<br>(9/9)   |
| M12                        | 473              | April 23, 2014        | 138                          | 125    | 264                             | 138    | 125         | 22.2 (0.66) | 82.6<br>(95% CI)<br>(75.0-88.3)<br>(114/138) | 75.2<br>(66.5-82.3)<br>(94/125)  | 78.8<br>(73.3-83.5)<br>(208/264) | 60.0<br>(44.4-73.9)<br>(27/45) | 79.5<br>(69.0-87.3)<br>(66/83)  | 83.9<br>(76.1-89.5)<br>(109/130) | 100.0<br>(51.7-100.0)<br>(6/6)   |
| M15                        | 492              | July 14, 2014         | 137                          | 108    | 235                             | 137    | 108         | 24.3 (0-66) | 72.3<br>(95% CI)<br>(63.9-79.4)<br>(99/137)  | 75.9<br>(66.8-83.4)<br>(82/108)  | 77.0<br>(71.0-82.1)<br>(181/235) | 58.8<br>(40.8-74.9)<br>(20/34) | 72.7<br>(60.2-82.6)<br>(48/66)  | 82.8<br>(74.9-88.7)<br>(106/128) | 100.0<br>(56.1-100.0)<br>(7/7)   |
| M18                        | 501              | October 8, 2014       | 139                          | 127    | 266                             | 139    | 127         | 22.8 (0-66) | 82.7<br>(95% CI)<br>(75.2-88.4)<br>(115/139) | 79.5<br>(71.3-86.0)<br>(101/127) | 81.2<br>(75.8-85.6)<br>(216/266) | 68.9<br>(53.2-81.4)<br>(31/45) | 82.3<br>(71.7-89.6)<br>(65/79)  | 84.6<br>(77.1-90.0)<br>(115/136) | 83.3<br>(36.5-99.1)<br>(5/6)     |
| Tar Au Ta                  |                  |                       |                              |        |                                 |        |             |             |                                              |                                  |                                  |                                |                                 |                                  |                                  |
| M0                         | 740              | June 14, 2013         | 193                          | 209    | 402                             | 193    | 209         | 26.7 (0-80) | 74.6<br>(95% CI)<br>(67.8-80.5)<br>(144/193) | 73.2<br>(66.6-79.0)<br>(153/209) | 73.9<br>(69.2-78.1)<br>(297/402) | 21.4<br>(5.7-51.2)<br>(3/14)   | 53.3<br>(44.6-61.9)<br>(72/135) | 87.1<br>(82.0-91.0)<br>(203/233) | 95.0<br>(73.1-99.7)<br>(19/20)   |
| M3                         | 785              | September 12, 2013    | 151                          | 171    | 322                             | 151    | 171         | 22.1 (0-70) | 64.2<br>(95% CI)<br>(56.0-71.8)<br>(97/151)  | 60.2<br>(52.5-67.5)<br>(103/171) | 62.1<br>(56.5-67.4)<br>(200/322) | 10.6<br>(4.0-23.9)<br>(5/47)   | 45.7<br>(36.5-55.2)<br>(53/116) | 88.3<br>(81.6-92.8)<br>(128/145) | 100.0<br>(73.2-100.0)<br>(14/14) |
| M6                         | 789              | November 26, 2013     | 100                          | 102    | 202                             | 100    | 102         | 24.0 (1-70) | 71.0<br>(95% CI)<br>(60.9-79.4)<br>(71/100)  | 68.6<br>(58.6-77.3)<br>(70/102)  | 69.8<br>(62.9-75.9)<br>(141/202) | 19.2<br>(7.3-40.0)<br>(5/26)   | 57.1<br>(44.8-68.7)<br>(40/70)  | 89.3<br>(80.7-94.4)<br>(83/93)   | 23.1<br>(6.2-54.0)<br>(13/13)    |
| M9                         | 814              | February 18, 2014     | 142                          | 149    | 291                             | 142    | 149         | 21.5 (0-80) | 81.0<br>(95% CI)<br>(73.4-86.9)<br>(115/142) | 81.9<br>(74.6-87.5)<br>(122/149) | 81.4<br>(76.4-85.6)<br>(237/291) | 39.3<br>(26.8-53.3)<br>(22/56) | 84.1<br>(74.4-90.7)<br>(74/88)  | 96.3<br>(91.2-98.6)<br>(131/136) | 90.9<br>(57.1-99.5)<br>(10/11)   |
| M12                        | 833              | May 15, 2014          | 113                          | 136    | 249                             | 113    | 136         | 19.2 (0-70) | 77.0<br>(95% CI)<br>(67.9-84.2)<br>(87/113)  | 80.2<br>(72.3-86.3)<br>(109/136) | 78.7<br>(73.0-83.5)<br>(196/249) | 33.3<br>(22.3-46.4)<br>(21/63) | 86.6<br>(75.5-93.3)<br>(58/67)  | 98.2<br>(92.9-99.7)<br>(108/110) | 100.0<br>(62.9-100.0)<br>(9/9)   |
| M15                        | 861              | August 6, 2014        | 150                          | 157    | 307                             | 150    | 157         | 21.6 (0-80) | 78.7<br>(95% CI)<br>(71.1-84.8)<br>(118/150) | 79.6<br>(72.3-85.5)<br>(125/157) | 79.2<br>(74.1-83.5)<br>(243/307) | 32.1<br>(20.7-46.1)<br>(18/56) | 79.0<br>(69.5-86.3)<br>(79/100) | 96.3<br>(91.1-98.6)<br>(129/134) | 100.0<br>(77.1-100.0)<br>(17/17) |
| M18                        | 879              | October 30, 2014      | 94                           | 102    | 196                             | 94     | 102         | 18.9 (0-70) | 71.3<br>(95% CI)<br>(60.9-79.9)<br>(67/94)   | 69.6<br>(59.6-78.1)<br>(71/102)  | 70.4<br>(63.4-76.6)<br>(138/196) | 26.5<br>(1.5-41.3)<br>(13/49)  | 77.2<br>(63.9-86.8)<br>(44/57)  | 90.4<br>(81.4-95.5)<br>(75/83)   | 85.7<br>(42.0-99.3)<br>(6/7)     |

(continued)

SUPPLEMENTAL TABLE 2  
Continued

| Survey of blood collection | Total population | Blood collection date | Characteristic of blood spot |                            | PI MSP1-19 antibody prevalence % |                                          |                                           |                                           |                                         |                                           |                                           |                                           |
|----------------------------|------------------|-----------------------|------------------------------|----------------------------|----------------------------------|------------------------------------------|-------------------------------------------|-------------------------------------------|-----------------------------------------|-------------------------------------------|-------------------------------------------|-------------------------------------------|
|                            |                  |                       | Number of dry blood spot     | Median age (range) (years) | Gender                           |                                          | Age (years)                               |                                           |                                         |                                           |                                           |                                           |
|                            |                  |                       |                              |                            | Male                             | Female                                   | Total                                     | 0-4                                       | 5-15                                    | 16-59                                     | 60 up                                     |                                           |
| Htoo Pinyin Nyar           |                  |                       |                              |                            |                                  |                                          |                                           |                                           |                                         |                                           |                                           |                                           |
| Ka Nu Hta                  |                  |                       |                              |                            |                                  |                                          |                                           |                                           |                                         |                                           |                                           |                                           |
| M0                         | 348              | June 14, 2013         | 321                          | 178                        | 143                              | 75.9<br>(95% CI)<br>(68.8-81.8)<br>(n/N) | 65.7<br>(57.3-73.3)<br>(94/143)<br>(n/N)  | 71.3<br>(66.0-76.2)<br>(229/321)<br>(n/N) | 20.0<br>(3.5-55.8)<br>(2/10)<br>(n/N)   | 53.5<br>(42.5-64.2)<br>(46/86)<br>(n/N)   | 79.3<br>(73.0-84.4)<br>(168/212)<br>(n/N) | 100.0<br>(71.7-100.0)<br>(13/13)<br>(n/N) |
| M3                         | 417              | September 12, 2013    | 272                          | 146                        | 126                              | 76.7<br>(95% CI)<br>(68.9-83.1)<br>(n/N) | 69.8<br>(60.9-77.5)<br>(88/126)<br>(n/N)  | 73.5<br>(67.8-78.6)<br>(200/272)<br>(n/N) | 18.2<br>(6.0-41.0)<br>(4/22)<br>(n/N)   | 55.6<br>(43.4-67.1)<br>(40/72)<br>(n/N)   | 86.9<br>(80.6-91.4)<br>(146/168)<br>(n/N) | 100.0<br>(65.6-100.0)<br>(10/10)<br>(n/N) |
| M6                         | 435              | December 11, 2013     | 260                          | 139                        | 121                              | 81.3<br>(95% CI)<br>(73.6-87.2)<br>(n/N) | 70.3<br>(61.2-78.0)<br>(85/121)<br>(n/N)  | 76.2<br>(70.4-81.1)<br>(198/260)<br>(n/N) | 45.5<br>(25.1-67.3)<br>(10/22)<br>(n/N) | 60.9<br>(48.4-72.2)<br>(42/69)<br>(n/N)   | 85.5<br>(78.9-90.4)<br>(136/159)<br>(n/N) | 100.0<br>(65.6-100.0)<br>(10/10)<br>(n/N) |
| M9                         | 449              | March 5, 2014         | 304                          | 156                        | 148                              | 90.4<br>(95% CI)<br>(84.4-94.3)<br>(n/N) | 84.5<br>(77.4-89.7)<br>(125/148)<br>(n/N) | 87.5<br>(83.1-90.9)<br>(266/304)<br>(n/N) | 68.4<br>(51.2-82.0)<br>(26/38)<br>(n/N) | 82.4<br>(72.2-89.5)<br>(70/85)<br>(n/N)   | 93.5<br>(88.4-96.6)<br>(159/170)<br>(n/N) | 100.0<br>(67.9-100.0)<br>(11/11)<br>(n/N) |
| M12                        | 469              | May 26, 2014          | 300                          | 159                        | 141                              | 84.3<br>(95% CI)<br>(77.5-89.4)<br>(n/N) | 80.9<br>(73.2-86.8)<br>(114/141)<br>(n/N) | 82.7<br>(77.8-86.7)<br>(248/300)<br>(n/N) | 46.3<br>(31.0-62.4)<br>(19/41)<br>(n/N) | 82.4<br>(72.1-89.5)<br>(70/85)<br>(n/N)   | 90.5<br>(84.8-94.3)<br>(153/169)<br>(n/N) | 100.0<br>(51.7-100.0)<br>(6/6)<br>(n/N)   |
| M15                        | 485              | August 21, 2014       | 302                          | 163                        | 139                              | 76.1<br>(95% CI)<br>(68.6-82.2)<br>(n/N) | 74.8<br>(66.6-81.6)<br>(104/139)<br>(n/N) | 75.5<br>(70.2-80.2)<br>(228/302)<br>(n/N) | 39.5<br>(25.4-55.6)<br>(17/43)<br>(n/N) | 68.1<br>(55.9-78.3)<br>(49/72)<br>(n/N)   | 85.9<br>(79.7-90.5)<br>(152/177)<br>(n/N) | 100.0<br>(65.6-100.0)<br>(10/10)<br>(n/N) |
| M18                        | 495              | November 13, 2014     | 285                          | 155                        | 130                              | 79.4<br>(95% CI)<br>(72.0-85.3)<br>(n/N) | 76.2<br>(67.7-83.0)<br>(99/130)<br>(n/N)  | 77.9<br>(72.5-82.5)<br>(222/285)<br>(n/N) | 42.9<br>(29.1-57.7)<br>(21/49)<br>(n/N) | 77.3<br>(65.0-86.3)<br>(51/66)<br>(n/N)   | 87.6<br>(81.2-92.1)<br>(141/161)<br>(n/N) | 100.0<br>(62.9-100.0)<br>(9/9)<br>(n/N)   |
| Htee Kaw Taw               |                  |                       |                              |                            |                                  |                                          |                                           |                                           |                                         |                                           |                                           |                                           |
| M0                         | 899              | July 4, 2013          | 488                          | 237                        | 251                              | 65.0<br>(95% CI)<br>(58.5-71.0)<br>(n/N) | 57.0<br>(50.6-63.1)<br>(143/251)<br>(n/N) | 60.9<br>(56.4-65.2)<br>(297/488)<br>(n/N) | 16.7<br>(5.5-38.2)<br>(4/24)<br>(n/N)   | 48.5<br>(40.8-56.3)<br>(82/169)<br>(n/N)  | 70.8<br>(65.0-76.0)<br>(196/277)<br>(n/N) | 83.3<br>(57.7-95.6)<br>(15/18)<br>(n/N)   |
| M3                         | 979              | October 7, 2013       | 533                          | 267                        | 266                              | 59.6<br>(95% CI)<br>(53.4-65.4)<br>(n/N) | 56.0<br>(49.8-62.0)<br>(149/266)<br>(n/N) | 57.8<br>(53.5-62.0)<br>(308/533)<br>(n/N) | 20.0<br>(10.5-34.1)<br>(10/50)<br>(n/N) | 43.7<br>(36.5-51.2)<br>(80/183)<br>(n/N)  | 72.5<br>(66.9-77.6)<br>(206/284)<br>(n/N) | 75.0<br>(47.4-91.7)<br>(12/16)<br>(n/N)   |
| M6                         | 1,029            | January 8, 2014       | 496                          | 240                        | 256                              | 64.6<br>(95% CI)<br>(58.1-70.6)<br>(n/N) | 57.4<br>(51.1-63.5)<br>(147/256)<br>(n/N) | 60.9<br>(56.4-65.2)<br>(302/496)<br>(n/N) | 20.0<br>(11.5-32.1)<br>(13/65)<br>(n/N) | 53.9<br>(46.6-61.0)<br>(104/193)<br>(n/N) | 77.5<br>(71.4-82.7)<br>(176/227)<br>(n/N) | 81.8<br>(47.8-96.8)<br>(9/11)<br>(n/N)    |
| M9                         | 1,070            | May 1, 2014           | 479                          | 243                        | 236                              | 67.5<br>(95% CI)<br>(61.2-73.3)<br>(n/N) | 58.9<br>(52.3-65.2)<br>(139/236)<br>(n/N) | 63.3<br>(58.8-67.6)<br>(303/479)<br>(n/N) | 19.1<br>(11.0-30.8)<br>(13/68)<br>(n/N) | 56.0<br>(48.1-63.5)<br>(94/168)<br>(n/N)  | 80.8<br>(75.0-85.5)<br>(189/234)<br>(n/N) | 77.8<br>(40.2-96.1)<br>(7/9)<br>(n/N)     |
| M12                        | 1,192            | June 24, 2014         | 513                          | 258                        | 255                              | 58.5<br>(95% CI)<br>(52.2-64.6)<br>(n/N) | 51.0<br>(44.7-57.3)<br>(130/255)<br>(n/N) | 54.8<br>(50.4-59.1)<br>(281/513)<br>(n/N) | 20.5<br>(12.9-30.7)<br>(18/88)<br>(n/N) | 49.7<br>(42.2-57.3)<br>(89/179)<br>(n/N)  | 71.2<br>(64.9-76.9)<br>(166-233)<br>(n/N) | 61.5<br>(32.3-84.9)<br>(8/13)<br>(n/N)    |
| M15                        | 1,217            | September 16, 2014    | 506                          | 264                        | 242                              | 68.6<br>(95% CI)<br>(62.5-74.0)<br>(n/N) | 67.4<br>(61.0-73.1)<br>(163/242)<br>(n/N) | 68.0<br>(63.7-72.0)<br>(344/506)<br>(n/N) | 33.7<br>(24.0-45.0)<br>(28/83)<br>(n/N) | 61.7<br>(54.0-68.9)<br>(108/175)<br>(n/N) | 83.9<br>(78.4-88.2)<br>(198/236)<br>(n/N) | 83.3<br>(50.9-97.1)<br>(10/12)<br>(n/N)   |
| M18                        | 1,236            | December 8, 2014      | 469                          | 231                        | 238                              | 67.5<br>(95% CI)<br>(61.0-73.4)<br>(n/N) | 60.9<br>(54.4-67.1)<br>(145/238)<br>(n/N) | 64.2<br>(59.6-68.5)<br>(301/469)<br>(n/N) | 29.5<br>(20.0-41.1)<br>(23/78)<br>(n/N) | 64.0<br>(56.8-70.6)<br>(126/197)<br>(n/N) | 78.9<br>(72.1-84.5)<br>(142/180)<br>(n/N) | 71.4<br>(42.0-90.4)<br>(10/14)<br>(n/N)   |

CI = confidence interval.

SUPPLEMENTAL TABLE 3  
Seroprevalence in antibody response to gSG6-P1 per age group and surveys

| Village        | Survey blood collection | Total population | Blood collection date | Characteristic of blood spot |      | Median age (range) (years) |                  | Antibody prevalence % |                  |                  |                  |                  |                    |
|----------------|-------------------------|------------------|-----------------------|------------------------------|------|----------------------------|------------------|-----------------------|------------------|------------------|------------------|------------------|--------------------|
|                |                         |                  |                       | Number of dry blood spot     | Male | Female                     | Age (years)      |                       |                  |                  |                  |                  |                    |
|                |                         |                  |                       |                              |      |                            | Male             | Female                | Total            | 0-4              | 5-15             | 15-59            | 60 up              |
|                |                         |                  |                       |                              |      |                            |                  | Gender                |                  |                  |                  |                  |                    |
| Htoo Pyin Nyar |                         |                  |                       |                              |      |                            |                  |                       |                  |                  |                  |                  |                    |
| M0             | May 20, 2013            | 373              | 258                   | 146                          | 112  | 27.3 (1-66)                | 45.2 (37.0-53.6) | 42.9 (33.7-52.6)      | 44.2 (38.1-50.0) | 33.3 (6.0-75.9)  | 41.0 (30.2-52.8) | 45.2 (37.6-53.1) | 66.7 (24.1-94.0)   |
|                |                         |                  |                       |                              |      |                            | (95% CI) (n/N)   | (95% CI) (n/N)        | (95% CI) (n/N)   | (95% CI) (n/N)   | (95% CI) (n/N)   | (95% CI) (n/N)   | (95% CI) (n/N)     |
| M3             | August 23, 2013         | 406              | 283                   | 154                          | 129  | 24.8 (1-66)                | 57.8 (49.6-65.6) | 60.5 (51.5-68.9)      | 59.0 (53.0-64.8) | 51.7 (32.9-70.1) | 53.7 (42.4-64.6) | 63.0 (55.1-70.3) | 57.1 (20.2-88.2)   |
|                |                         |                  |                       |                              |      |                            | (95% CI) (n/N)   | (95% CI) (n/N)        | (95% CI) (n/N)   | (95% CI) (n/N)   | (95% CI) (n/N)   | (95% CI) (n/N)   | (95% CI) (n/N)     |
| M6             | November 7, 2013        | 434              | 300                   | 158                          | 142  | 24.8 (0-66)                | 49.4 (41.4-57.4) | 49.3 (40.9-57.8)      | 49.3 (43.6-55.1) | 43.6 (28.2-60.2) | 57.8 (46.5-68.4) | 45.6 (38.0-53.4) | 71.4 (30.3-94.9)   |
|                |                         |                  |                       |                              |      |                            | (95% CI) (n/N)   | (95% CI) (n/N)        | (95% CI) (n/N)   | (95% CI) (n/N)   | (95% CI) (n/N)   | (95% CI) (n/N)   | (95% CI) (n/N)     |
| M9             | January 28, 2014        | 464              | 307                   | 160                          | 147  | 23.9 (0-66)                | 50.0 (42.0-58.0) | 36.1 (28.4-44.4)      | 43.3 (37.7-49.1) | 34.8 (21.8-50.3) | 47.7 (36.9-58.7) | 43.4 (35.8-51.3) | 44.4 (15.3-77.3)   |
|                |                         |                  |                       |                              |      |                            | (95% CI) (n/N)   | (95% CI) (n/N)        | (95% CI) (n/N)   | (95% CI) (n/N)   | (95% CI) (n/N)   | (95% CI) (n/N)   | (95% CI) (n/N)     |
| M12            | April 23, 2014          | 473              | 260                   | 135                          | 125  | 22.8 (0-66)                | 60.7 (51.9-68.9) | 68.0 (59.0-75.9)      | 64.2 (58.0-70.0) | 65.1 (49.0-78.6) | 63.4 (52.0-73.6) | 65.9 (57.0-73.9) | 33.3 (6.0-75.9)    |
|                |                         |                  |                       |                              |      |                            | (95% CI) (n/N)   | (95% CI) (n/N)        | (95% CI) (n/N)   | (95% CI) (n/N)   | (95% CI) (n/N)   | (95% CI) (n/N)   | (95% CI) (n/N)     |
| M15            | July 14, 2014           | 492              | 233                   | 127                          | 106  | 24.3 (0-66)                | 80.3 (72.1-86.6) | 76.4 (67.0-83.9)      | 78.5 (72.6-83.5) | 70.6 (52.3-84.3) | 83.1 (71.3-90.9) | 77.2 (68.7-84.0) | 100.0 (56.1-100.0) |
|                |                         |                  |                       |                              |      |                            | (95% CI) (n/N)   | (95% CI) (n/N)        | (95% CI) (n/N)   | (95% CI) (n/N)   | (95% CI) (n/N)   | (95% CI) (n/N)   | (95% CI) (n/N)     |
| M18            | October 8, 2014         | 501              | 265                   | 139                          | 126  | 23.0 (0-66)                | 83.5 (76.0-89.0) | 81.7 (73.7-87.9)      | 82.6 (77.4-86.9) | 82.2 (67.4-91.5) | 78.2 (67.2-86.5) | 85.3 (78.0-90.6) | 83.3 (36.5-99.1)   |
|                |                         |                  |                       |                              |      |                            | (95% CI) (n/N)   | (95% CI) (n/N)        | (95% CI) (n/N)   | (95% CI) (n/N)   | (95% CI) (n/N)   | (95% CI) (n/N)   | (95% CI) (n/N)     |
| Tar Au Ta      |                         |                  |                       |                              |      |                            |                  |                       |                  |                  |                  |                  |                    |
| M0             | June 14, 2013           | 740              | 404                   | 192                          | 212  | 26.8 (0-80)                | 68.2 (61.1-74.7) | 62.7 (55.8-69.2)      | 65.3 (60.5-69.9) | 42.9 (18.8-70.4) | 58.1 (49.3-66.4) | 72.4 (66.1-78.0) | 50.0 (28.8-71.2)   |
|                |                         |                  |                       |                              |      |                            | (95% CI) (n/N)   | (95% CI) (n/N)        | (95% CI) (n/N)   | (95% CI) (n/N)   | (95% CI) (n/N)   | (95% CI) (n/N)   | (95% CI) (n/N)     |
| M3             | September 12, 2013      | 785              | 322                   | 149                          | 173  | 22.2 (0-70)                | 77.2 (69.5-83.5) | 71.7 (62.7-78.5)      | 74.2 (69.0-78.8) | 63.6 (47.7-77.2) | 70.3 (61.1-78.2) | 78.8 (71.1-84.9) | 92.9 (64.2-99.6)   |
|                |                         |                  |                       |                              |      |                            | (95% CI) (n/N)   | (95% CI) (n/N)        | (95% CI) (n/N)   | (95% CI) (n/N)   | (95% CI) (n/N)   | (95% CI) (n/N)   | (95% CI) (n/N)     |
| M6             | November 26, 2013       | 789              | 201                   | 98                           | 103  | 24.1 (1-70)                | 75.5 (65.6-83.4) | 81.6 (72.4-88.3)      | 78.6 (72.2-83.9) | 72.0 (50.4-87.1) | 73.2 (61.2-82.7) | 82.6 (73.0-89.4) | 92.3 (62.1-99.6)   |
|                |                         |                  |                       |                              |      |                            | (95% CI) (n/N)   | (95% CI) (n/N)        | (95% CI) (n/N)   | (95% CI) (n/N)   | (95% CI) (n/N)   | (95% CI) (n/N)   | (95% CI) (n/N)     |
| M9             | February 18, 2014       | 814              | 292                   | 144                          | 148  | 21.7 (0-80)                | 46.5 (38.3-55.0) | 47.3 (39.1-55.6)      | 46.9 (41.1-52.8) | 40.0 (27.3-54.8) | 51.1 (40.3-61.9) | 45.7 (37.2-54.3) | 63.6 (31.6-87.6)   |
|                |                         |                  |                       |                              |      |                            | (95% CI) (n/N)   | (95% CI) (n/N)        | (95% CI) (n/N)   | (95% CI) (n/N)   | (95% CI) (n/N)   | (95% CI) (n/N)   | (95% CI) (n/N)     |
| M12            | May 15, 2014            | 833              | 249                   | 114                          | 135  | 19.3 (0-70)                | 59.6 (50.0-68.6) | 56.3 (47.5-64.7)      | 57.8 (51.4-64.0) | 39.7 (27.8-52.8) | 59.1 (46.3-70.8) | 66.7 (57.0-75.2) | 66.7 (30.9-91.0)   |
|                |                         |                  |                       |                              |      |                            | (95% CI) (n/N)   | (95% CI) (n/N)        | (95% CI) (n/N)   | (95% CI) (n/N)   | (95% CI) (n/N)   | (95% CI) (n/N)   | (95% CI) (n/N)     |
| M15            | August 6, 2014          | 861              | 307                   | 152                          | 155  | 21.3 (0-80)                | 92.1 (86.3-95.7) | 93.5 (88.1-96.7)      | 92.8 (89.2-95.4) | 94.7 (84.5-98.6) | 92.0 (84.4-96.2) | 92.5 (86.4-96.2) | 93.8 (67.7-99.7)   |
|                |                         |                  |                       |                              |      |                            | (95% CI) (n/N)   | (95% CI) (n/N)        | (95% CI) (n/N)   | (95% CI) (n/N)   | (95% CI) (n/N)   | (95% CI) (n/N)   | (95% CI) (n/N)     |
| M18            | October 30, 2014        | 879              | 195                   | 93                           | 102  | 19.5 (0-70)                | 57.0 (46.3-67.1) | 74.5 (64.8-82.4)      | 66.2 (59.0-72.7) | 47.8 (33.1-62.9) | 76.8 (63.3-86.6) | 72.1 (61.2-81.0) | 28.6 (5.1-69.7)    |
|                |                         |                  |                       |                              |      |                            | (95% CI) (n/N)   | (95% CI) (n/N)        | (95% CI) (n/N)   | (95% CI) (n/N)   | (95% CI) (n/N)   | (95% CI) (n/N)   | (95% CI) (n/N)     |

(continued)

SUPPLEMENTAL TABLE 3  
Continued

| Survey blood collection<br>Village | Total population | Blood collection date | Characteristic of blood spot |        | Median age (range) (years) |             | Antibody prevalence %     |                                  |                                  |                                  |                                  |                                  |                                  |
|------------------------------------|------------------|-----------------------|------------------------------|--------|----------------------------|-------------|---------------------------|----------------------------------|----------------------------------|----------------------------------|----------------------------------|----------------------------------|----------------------------------|
|                                    |                  |                       | Number of dry blood spot     | Female | Male                       | Female      | Male                      | Gender                           |                                  | Age (years)                      |                                  |                                  |                                  |
|                                    |                  |                       |                              |        |                            |             |                           | Total                            | 0-4                              | 5-15                             | 15-59                            | 60 up                            |                                  |
| Htoo Pyin Nyar                     |                  |                       |                              |        |                            |             |                           |                                  |                                  |                                  |                                  |                                  |                                  |
| Ka Nu Hta                          |                  |                       |                              |        |                            |             |                           |                                  |                                  |                                  |                                  |                                  |                                  |
| M0                                 | 348              | June 14, 2013         | 325                          | 180    | 145                        | 29.1 (2-73) | 55.6<br>(95% CI)<br>(n/N) | 51.7<br>(43.3-60.0)<br>(75/145)  | 53.8<br>(48.3-59.3)<br>(175/325) | 33.3<br>(9.0-69.1)<br>(3/9)      | 40.2<br>(30.0-51.3)<br>(35/87)   | 59.3<br>(52.4-65.8)<br>(128/216) | 69.2<br>(38.9-89.7)<br>(9/13)    |
| M3                                 | 417              | September 12, 2013    | 277                          | 147    | 130                        | 28.1 (1-73) | %<br>(95% CI)<br>(n/N)    | 51.5<br>(42.7-60.3)<br>(67/130)  | 49.5<br>(43.4-55.5)<br>(137/277) | 30.4<br>(14.1-53.0)<br>(7/23)    | 38.4<br>(27.4-50.5)<br>(28/73)   | 56.7<br>(49.0-64.2)<br>(97/171)  | 50.0<br>(20.1-79.9)<br>(5/10)    |
| M6                                 | 435              | December 11, 2013     | 263                          | 141    | 122                        | 28.1 (0-73) | %<br>(95% CI)<br>(n/N)    | 52.5<br>(43.3-61.5)<br>(64/122)  | 57.4<br>(51.2-63.4)<br>(151/263) | 59.1<br>(36.7-78.5)<br>(13/22)   | 55.7<br>(43.4-67.4)<br>(39/70)   | 56.5<br>(48.5-64.2)<br>(91/161)  | 80.0<br>(44.2-96.5)<br>(8/10)    |
| M9                                 | 449              | March 5, 2014         | 301                          | 155    | 146                        | 25.9 (0-73) | %<br>(95% CI)<br>(n/N)    | 49.3<br>(41.0-57.7)<br>(72/146)  | 48.5<br>(42.8-54.3)<br>(146/301) | 43.2<br>(27.5-60.4)<br>(16/37)   | 45.2<br>(34.5-56.4)<br>(38/84)   | 52.1<br>(44.3-59.8)<br>(88/169)  | 36.4<br>(12.4-68.4)<br>(4/11)    |
| M12                                | 469              | May 26, 2014          | 298                          | 160    | 138                        | 25.1 (0-73) | %<br>(95% CI)<br>(n/N)    | 39.1<br>(31.1-47.8)<br>(54/138)  | 40.6<br>(35.0-46.4)<br>(121/298) | 31.7<br>(18.6-48.2)<br>(13/41)   | 47.6<br>(36.7-58.7)<br>(40/84)   | 38.4<br>(31.0-46.4)<br>(63/164)  | 55.6<br>(22.7-84.7)<br>(5/9)     |
| M15                                | 485              | August 21, 2014       | 300                          | 162    | 138                        | 26.0 (0-70) | %<br>(95% CI)<br>(n/N)    | 96.4<br>(89.4-97.3)<br>(133/138) | 95.3<br>(92.1-97.3)<br>(286/300) | 81.0<br>(65.4-90.9)<br>(34/42)   | 97.1<br>(89.1-99.5)<br>(68/70)   | 97.8<br>(94.0-99.3)<br>(174/178) | 100.0<br>(65.6-100.0)<br>(10/10) |
| M18                                | 495              | November 13, 2014     | 282                          | 154    | 128                        | 24.6 (0-70) | %<br>(95% CI)<br>(n/N)    | 86.4<br>(79.7-91.2)<br>(133/154) | 85.1<br>(80.3-89.3)<br>(240/282) | 63.3<br>(48.3-76.2)<br>(31/49)   | 84.6<br>(73.1-92.0)<br>(55/65)   | 91.2<br>(85.4-94.9)<br>(145/159) | 100.0<br>(62.9-100.0)<br>(9/9)   |
| Htee Kaw Taw                       |                  |                       |                              |        |                            |             |                           |                                  |                                  |                                  |                                  |                                  |                                  |
| M0                                 | 899              | July 4, 2013          | 490                          | 241    | 249                        | 26.4 (0-94) | %<br>(95% CI)<br>(n/N)    | 92.9<br>(88.8-95.7)<br>(224/241) | 94.8<br>(91.0-97.1)<br>(236/249) | 91.7<br>(71.5-98.6)<br>(22/24)   | 92.2<br>(86.8-95.6)<br>(154/167) | 95.0<br>(91.6-97.2)<br>(267/281) | 94.4<br>(70.6-99.7)<br>(17/18)   |
| M3                                 | 979              | October 7, 2013       | 535                          | 269    | 266                        | 24.5 (0-89) | %<br>(95% CI)<br>(n/N)    | 88.5<br>(80.6-89.4)<br>(230/269) | 86.2<br>(82.0-90.5)<br>(231/266) | 81.6<br>(67.5-90.8)<br>(40/49)   | 85.7<br>(79.6-90.3)<br>(156/182) | 86.8<br>(82.2-90.4)<br>(249/287) | 94.1<br>(69.2-99.7)<br>(16/17)   |
| M6                                 | 1,029            | January 8, 2014       | 500                          | 243    | 257                        | 22.1 (0-78) | %<br>(95% CI)<br>(n/N)    | 78.2<br>(72.4-83.1)<br>(190/243) | 85.6<br>(80.6-89.5)<br>(220/257) | 75.8<br>(63.4-85.1)<br>(50/66)   | 81.9<br>(75.6-86.9)<br>(158/193) | 84.8<br>(79.3-89.0)<br>(195/230) | 63.6<br>(31.6-87.6)<br>(7/11)    |
| M9                                 | 1,070            | May 1, 2014           | 478                          | 240    | 238                        | 22.4 (0-78) | %<br>(95% CI)<br>(n/N)    | 87.9<br>(83.0-91.6)<br>(211/240) | 86.6<br>(81.4-90.5)<br>(206/238) | 77.9<br>(65.9-86.7)<br>(53/68)   | 86.9<br>(80.6-91.4)<br>(146/168) | 89.7<br>(84.9-93.2)<br>(209/233) | 100.0<br>(62.9-100.0)<br>(9/9)   |
| M12                                | 1,192            | June 24, 2014         | 527                          | 269    | 258                        | 21.7 (0-89) | %<br>(95% CI)<br>(n/N)    | 85.1<br>(80.2-89.0)<br>(229/269) | 89.1<br>(84.6-92.6)<br>(230/258) | 87.6<br>(78.6-93.4)<br>(459/527) | 88.8<br>(83.1-92.8)<br>(166/187) | 85.7<br>(80.5-89.8)<br>(204/238) | 84.6<br>(53.7-97.3)<br>(11/13)   |
| M15                                | 1,217            | September 16, 2014    | 506                          | 266    | 240                        | 21.6 (0-78) | %<br>(95% CI)<br>(n/N)    | 81.2<br>(75.9-85.6)<br>(216/266) | 85.0<br>(79.7-89.1)<br>(204/240) | 82.1<br>(71.9-89.3)<br>(69/84)   | 85.8<br>(79.6-90.4)<br>(151/176) | 81.3<br>(75.6-85.9)<br>(191/235) | 81.8<br>(47.8-96.8)<br>(9/11)    |
| M18                                | 1,236            | December 8, 2014      | 467                          | 233    | 234                        | 20.0 (0-78) | %<br>(95% CI)<br>(n/N)    | 82.8<br>(77.2-87.3)<br>(193/233) | 87.2<br>(82.1-91.1)<br>(204/234) | 84.0<br>(73.3-91.1)<br>(63/75)   | 85.4<br>(79.6-89.8)<br>(170/199) | 84.9<br>(78.6-89.7)<br>(152/179) | 85.7<br>(56.2-97.5)<br>(12/14)   |

CI = confidence interval; MSP-1<sub>19</sub> = merozoite surface protein 119.
